# Supplementary material
Source: HighWire-hosted journal article supplement (https://ard.bmj.com/content/76/4/708)

**Supplementary figure S1 Overview of patient selection**

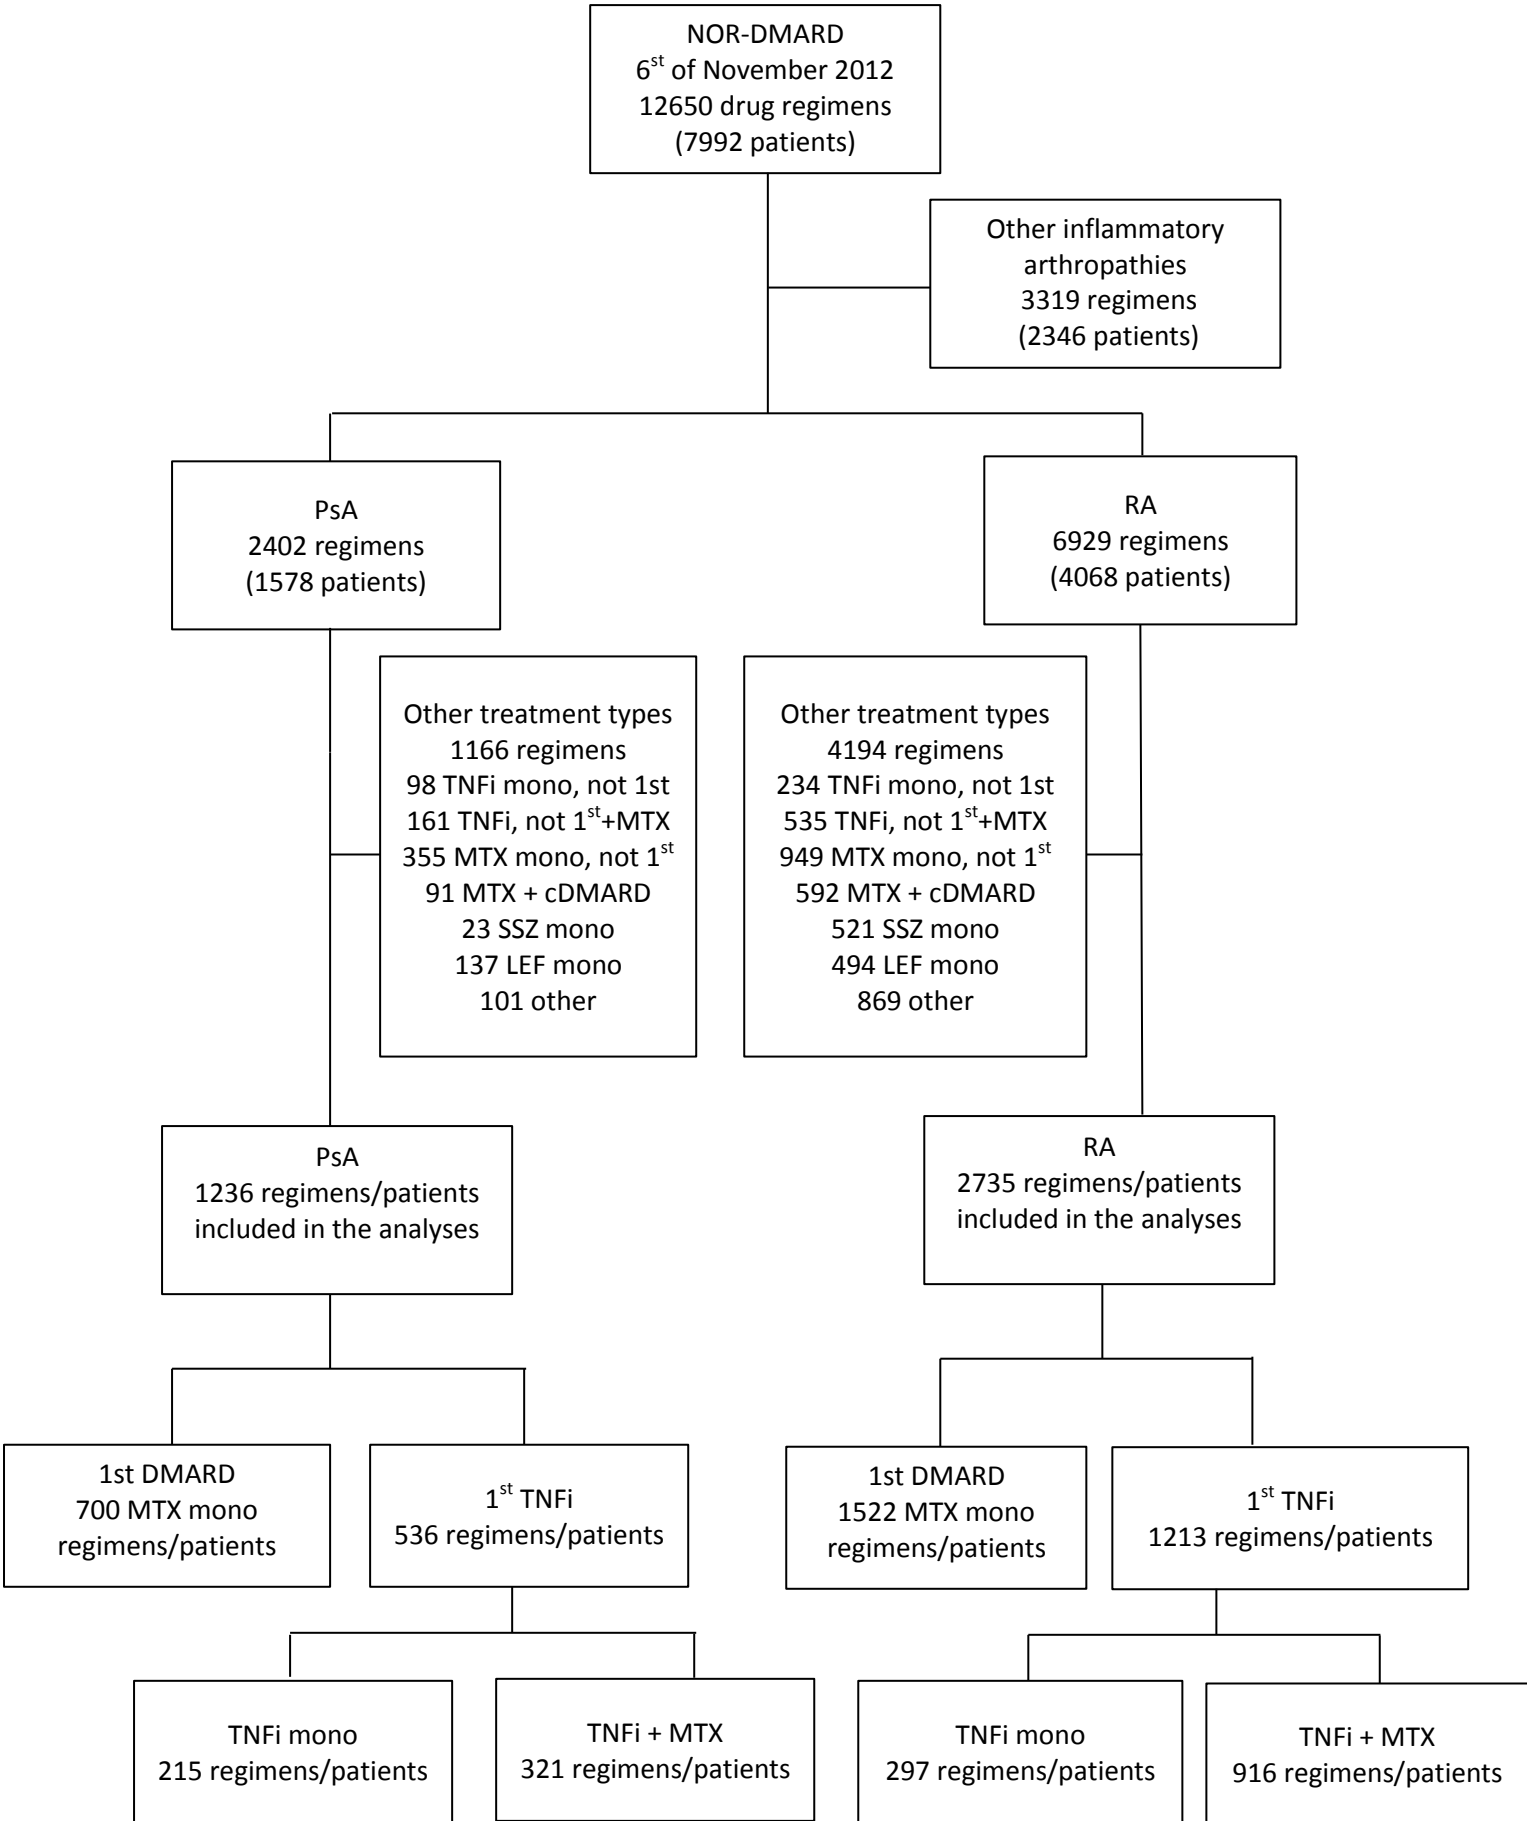

Supplement: inline-supplementary-material-1 [file inline-supplementary-material-1.pdf]
